# Supplementary material
Source: publisher figshare collection journal article supplement (https://acs.figshare.com/ndownloader/files/4080529)
Supplement: Supplementary file 1 [file 4080529]

## ***Manganese as a Substitute for Rhenium in CO<sub>2</sub> Reduction Catalysts: The Importance of Acids.***

Jonathan M. Smieja, Matthew D. Sampson, Kyle A. Grice, Eric E. Benson, Jesse D. Froehlich, and Clifford P. Kubiak\*

Department of Chemistry and Biochemistry, University of California, San Diego, 9500 Gilman Drive, Mail Code 0358, La Jolla, California 92093–0358, United States

### **Table of Contents**

|                                        |     |
|----------------------------------------|-----|
| Figure S1                              | S2  |
| Figure S2                              | S3  |
| Figure S3                              | S3  |
| Figure S4                              | S4  |
| Figure S5                              | S4  |
| Figure S6                              | S5  |
| Table S1                               | S6  |
| Costentin and Savéant TOF calculations | S7  |
| Figure S7                              | S8  |
| Table S3                               | S9  |
| Table S4                               | S10 |

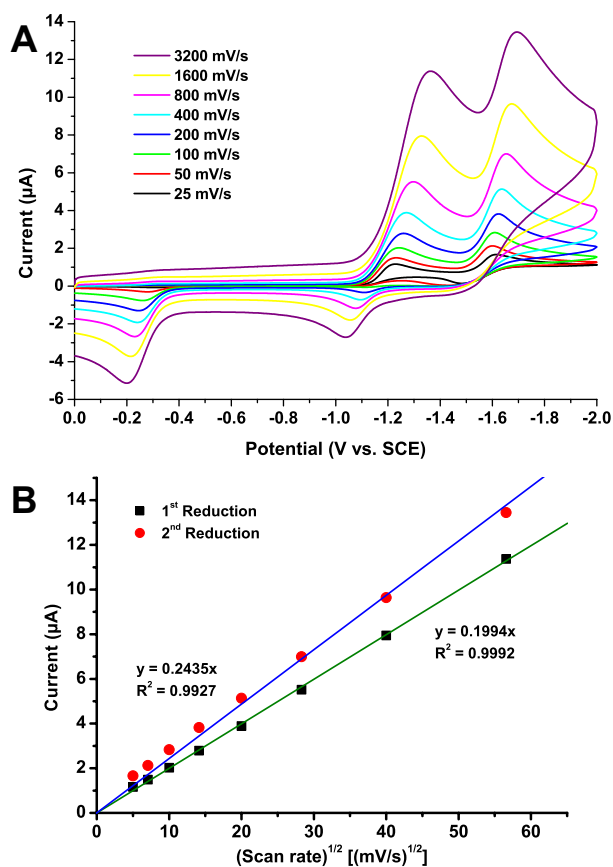

**Figure S1.** A.) Cyclic voltammogram scan rate dependence of 1 mM  $[\text{Mn}(\text{bpy-}t\text{Bu})(\text{CO})_3(\text{MeCN})](\text{OTf})$  (**3**) under an atmosphere of argon in acetonitrile. Electrochemical conditions were 0.1 M TBAH as supporting electrolyte, 1 mm diameter glassy carbon working electrode, Pt wire counter electrode, and Ag wire pseudo-reference electrode separated from the bulk solution by a Vycor tip. B.) Plot showing that current increases with the square root of the scan rate. This behavior is indicative of a freely-diffusing species where the electrode reaction is controlled by mass transport.

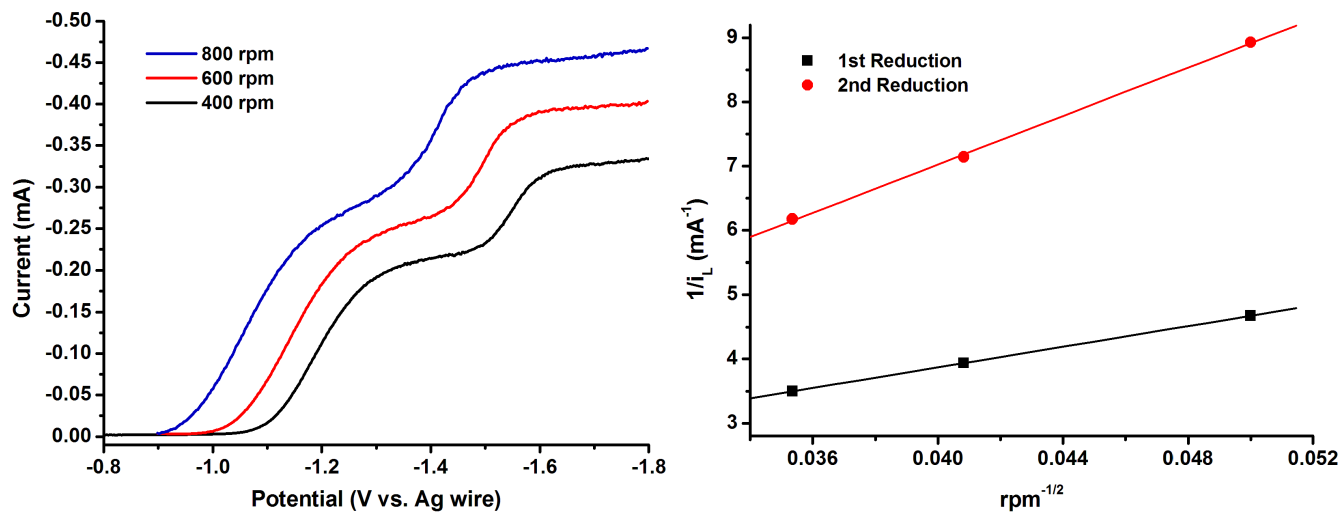

**Figure S2.** Rotating disk electrode data (left) and Levich-Koutecky plot (right) for 1 mM  $[\text{Mn}(\text{bpy-}t\text{Bu})(\text{CO})_3(\text{MeCN})](\text{OTf})$  (3) in MeCN with 0.1M TBAH as the supporting electrolyte under an atmosphere of argon.

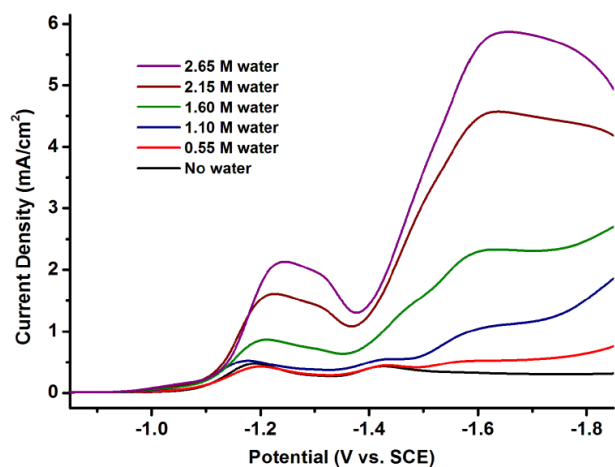

**Figure S3.** Linear scan voltammograms showing the electrocatalytic reduction of CO<sub>2</sub> to CO by 1 mM  $\text{Mn}(\text{bpy-}t\text{Bu})(\text{CO})_3\text{Br}$  (1) in acetonitrile with addition of water. Solution is under an atmosphere of, and saturated with (*ca.* 0.28 M), carbon dioxide. Electrochemical conditions were 0.1 M TBAH supporting electrolyte, 1 mm diameter glassy carbon working electrode, Pt wire counter electrode, and Ag wire pseudo-reference electrode separated from the bulk solution by a Vycor tip.

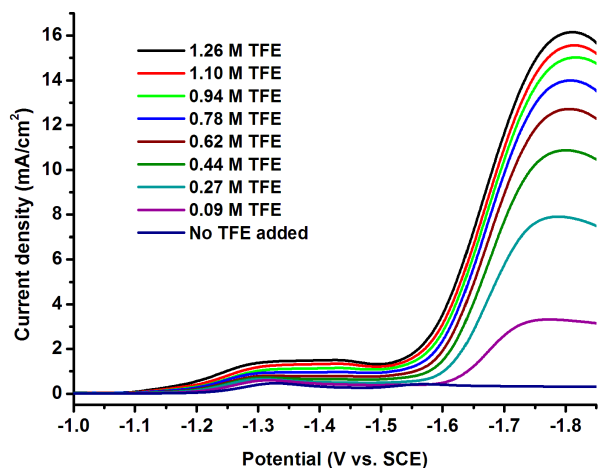

**Figure S4.** Linear scan voltammograms showing the electrocatalytic reduction of  $\text{CO}_2$  to CO by 1 mM  $\text{Mn}(\text{bpy-}t\text{Bu})(\text{CO})_3\text{Br}$  (1) in acetonitrile with addition of trifluoroethanol (TFE). The solution is under an atmosphere of, and saturated with (*ca.* 0.28 M), carbon dioxide. Electrochemical conditions were 0.1 M TBAH as supporting electrolyte, 1 mm diameter glassy carbon working electrode, Pt wire counter electrode, and Ag wire pseudo-reference electrode separated from the bulk solution by a Vycor tip.

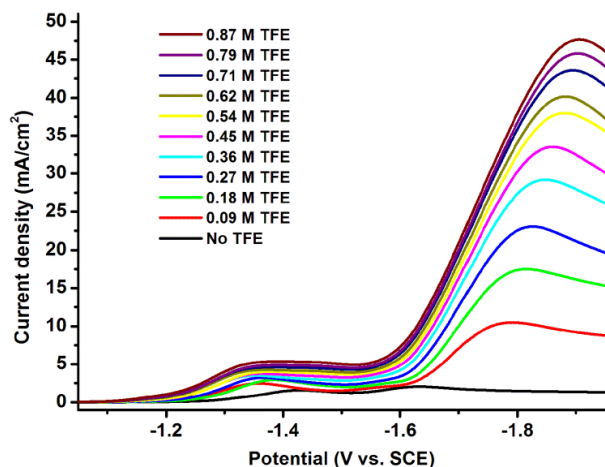

**Figure S5.** Linear scan voltammograms showing the electrocatalytic reduction of  $\text{CO}_2$  to CO by 5 mM  $\text{Mn}(\text{bpy-}t\text{Bu})(\text{CO})_3\text{Br}$  (1) in acetonitrile with addition of trifluoroethanol (TFE). Solution is under an atmosphere of, and saturated with (*ca.* 0.28 M), carbon dioxide. Electrochemical conditions were 0.1 M TBAH as supporting electrolyte, 1 mm diameter glassy carbon working electrode, Pt wire counter electrode, and Ag wire pseudo-reference electrode separated from the bulk solution by a Vycor tip.

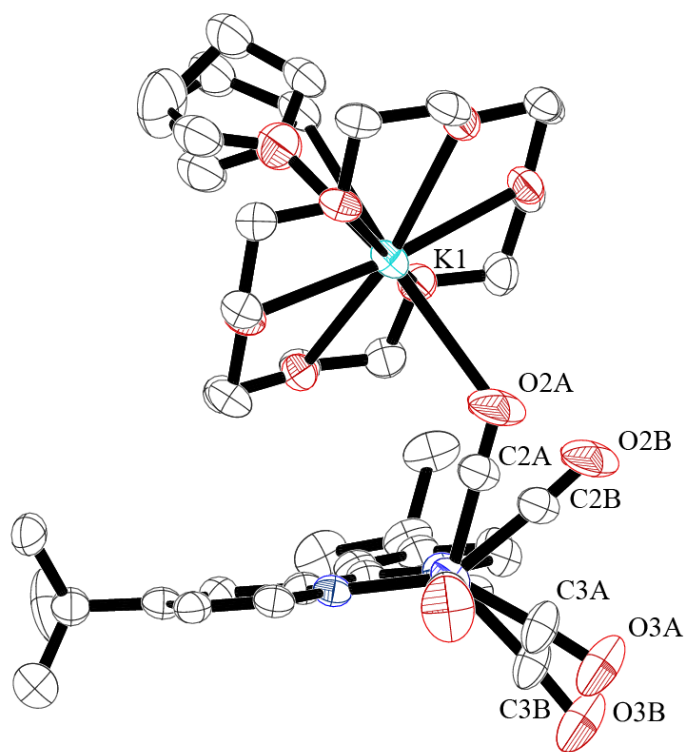

**Figure S6.** Molecular structure of the disordered pair of anions in the crystal structure of  $[\text{Mn}(\text{bpy-}i\text{tBu})(\text{CO})_3][\text{K}(\text{18-crown-6})(\text{THF})]$  (**2**), with hydrogen atoms removed for clarity. Both independent molecules in the unit cell contained disordered THF molecules coordinated to the 18-crown-6 ether encapsulated potassium. This manganese anion contained positional disorder of the carbonyls around the metal center, with the major occupancy modeled at 69%.

**Table S1. Crystallographic data for Mn(bpy-*t*Bu)(CO)<sub>3</sub>Br (1) and [Mn(bpy-*t*Bu)(CO)<sub>3</sub>][K(18-crown-6)(THF)] (2)**

|                                   | Mn(bpy- <i>t</i> Bu)(CO) <sub>3</sub> Br (1)                                                       | [Mn(bpy- <i>t</i> Bu)(CO) <sub>3</sub> ][K(18-crown-6)(THF)] (2)                                   |
|-----------------------------------|----------------------------------------------------------------------------------------------------|----------------------------------------------------------------------------------------------------|
| Identification code               | eb_111026mo_0m                                                                                     | eb_111019_0m                                                                                       |
| Empirical formula                 | C21 H24 Br Mn N2 O3                                                                                | C74 H112 K2 Mn2 N4 O20                                                                             |
| Formula weight                    | 487.27                                                                                             | 1565.76                                                                                            |
| Temperature                       | 100(2) K                                                                                           | 100(2) K                                                                                           |
| Wavelength                        | 0.71073 Å                                                                                          | 1.54178 Å                                                                                          |
| Crystal system                    | Monoclinic                                                                                         | Monoclinic                                                                                         |
| Space group                       | P2(1)/n                                                                                            | P2(1)/n                                                                                            |
| Unit cell dimensions              | a = 13.5528(5) Å    α = 90°<br>b = 17.1546(6) Å    β = 96.8790(10)°<br>c = 19.1899(6) Å    γ = 90° | a = 18.2559(4) Å    α = 90°<br>b = 18.4759(4) Å    β = 98.5560(10)°<br>c = 24.2973(5) Å    γ = 90° |
| Volume                            | 4429.4(3) Å <sup>3</sup>                                                                           | 8104.1(3) Å <sup>3</sup>                                                                           |
| Z                                 | 8                                                                                                  | 4                                                                                                  |
| Density (calculated)              | 1.461 Mg/m <sup>3</sup>                                                                            | 1.283 Mg/m <sup>3</sup>                                                                            |
| Absorption coefficient            | 2.423 mm <sup>-1</sup>                                                                             | 4.023 mm <sup>-1</sup>                                                                             |
| F(000)                            | 1984                                                                                               | 3328                                                                                               |
| Crystal size                      | 0.10 x 0.05 x 0.05 mm <sup>3</sup>                                                                 | 0.10 x 0.10 x 0.01 mm <sup>3</sup>                                                                 |
| Theta range for data collection   | 2.11 to 31.78°                                                                                     | 2.83 to 50.00°                                                                                     |
| Index ranges                      | -19 ≤ h ≤ 19, -25 ≤ k ≤ 23, -22 ≤ l ≤ 28                                                           | -13 ≤ h ≤ 18, -18 ≤ k ≤ 18, -24 ≤ l ≤ 24                                                           |
| Reflections collected             | 45311                                                                                              | 28572                                                                                              |
| Independent reflections           | 13529 [R(int) = 0.0384]                                                                            | 8004 [R(int) = 0.0488]                                                                             |
| Completeness to theta = 25.00°    | 99.9%                                                                                              | 96.1%                                                                                              |
| Absorption correction             | Semi-empirical from equivalents                                                                    | Semi-empirical from equivalents                                                                    |
| Max. and min. transmission        | 0.8885 and 0.7937                                                                                  | 0.9609 and 0.6891                                                                                  |
| Refinement method                 | Full-matrix least-squares on F <sup>2</sup>                                                        | Full-matrix least-squares on F <sup>2</sup>                                                        |
| Data / restraints / parameters    | 13529 / 0 / 517                                                                                    | 8004 / 0 / 957                                                                                     |
| Goodness-of-fit on F <sup>2</sup> | 1.079                                                                                              | 1.026                                                                                              |
| Final R indices [I > 2σ(I)]       | R1 = 0.0407, wR2 = 0.1031                                                                          | R1 = 0.0733, wR2 = 0.1941                                                                          |
| R indices (all data)              | R1 = 0.0617, wR2 = 0.1103                                                                          | R1 = 0.1060, wR2 = 0.2255                                                                          |
| Largest diff. peak and hole       | 0.866 and -0.716 e.Å <sup>-3</sup>                                                                 | 1.401 and -0.301 e.Å <sup>-3</sup>                                                                 |

### Costentin and Savéant TOF calculations<sup>1</sup>

$$\frac{i}{FA} = \frac{\sqrt{k_{cat}D}[C]_p^0}{1 + \exp\left[\frac{F}{RT}(E - E_{CO_2/CO, s, AH}^0)\right]} \quad (1)$$

$$k_{cat} = \frac{i^2 \left(1 + \exp\left[\frac{F}{RT}(E - E_{CO_2/CO, s, AH}^0)\right]\right)^2}{F^2 A^2 D ([C]_p^0)^2} \quad (2)$$

$$\begin{aligned} \text{TOF} &= \frac{k_{cat}}{1 + \exp\left[\frac{F}{RT}(E - E_{CO_2/CO, s, AH}^0)\right]} \\ &\approx k_{cat} \text{ (when } E - E_{cat}^0 < -0.1) \end{aligned} \quad (3)$$

In these equations,  $i$  is Coulombs per second transferred during bulk electrolysis,  $F$  is Faraday's constant,  $A$  is the surface area of the electrode,  $k_{cat}$  is the rate constant of the catalytic reaction,  $D$  is the diffusion coefficient,  $[C]_p^0$  is the concentration of the catalyst without substrate,  $R$  is the universal gas constant,  $T$  is temperature,  $E$  is the applied potential during bulk electrolysis,  $E_{CO_2/CO, s, AH}^0$  is the standard potential for the conversion of  $CO_2$  into  $CO$  in a solvent,  $s$ , and in the presence of an acid,  $AH$ , and TOF is the turnover frequency.

For  $Mn(bpy-tBu)(CO)_3Br$  (1), the values used were:

$$[C]_p^0 = 5.0 \times 10^{-6} \text{ mol cm}^{-3}$$

$$D = 1.1 \times 10^{-5} \text{ cm}^2 \text{ s}^{-1}$$

$$A = 0.0707 \text{ cm}^2$$

$$i = 1.856 \times 10^{-3} \text{ C s}^{-1}$$

$$F = 96845 \text{ C mol}^{-1}$$

$$F/RT = 38.92 \text{ V}^{-1}$$

$$E = -2.2 \text{ V vs. SCE}$$

For these calculations, it was assumed that  $E_{CO_2/CO, s, AH}^0 = -3.1 \text{ V vs. SCE}$ , which is an appropriate value for  $CO_2$  reduction in MeCN solvent.<sup>1</sup> This value is not significant given that the applied potential during bulk electrolysis for Mn catalyst 1 is much less than  $-3.1 \text{ V vs. SCE}$ , and thus, the term  $\exp[(F/RT)(E - E_{CO_2/CO, s, AH}^0)] \approx 0$ . Therefore, the numerator in eqn (2) can be simplified to  $i^2$ . This leads to an equation very similar to the equations described in the main manuscript, and a calculated TOF of  $267 \text{ s}^{-1}$  for catalyst 1 in the presence of  $1.26 \text{ M TFE}$ .

(1) Costentin, C.; Drouet, S.; Robert, M.; Savéant, J.-M. *Science* **2012**, 338, 90.

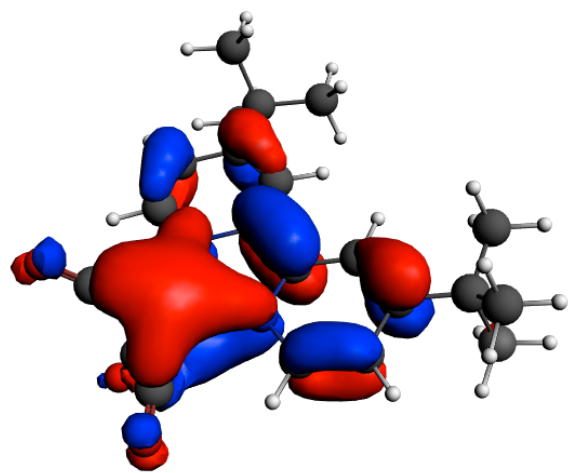

**Figure S7.** The representation of the DFT-calculated HOMO of  $[\text{Mn}(\text{bpy-}t\text{Bu})(\text{CO})_3]^{-1}$  calculated using ADF 2007.01.



**Table S3. Comparison of selected experimental and DFT-calculated bond lengths (Å) and angles (°) for [Mn(bpy-*t*Bu)(CO)<sub>3</sub>]<sup>−</sup>**

| Bond(s)     | Exp. <sup>a</sup> | DFT/BP86 |
|-------------|-------------------|----------|
| Mn2–N3      | 1.982             | 1.997    |
| Mn2–N4      | 1.992             | 2.013    |
| Mn2–C22     | 1.774             | 1.792    |
| Mn2–C23     | 1.785             | 1.795    |
| Mn2–C24     | 1.767             | 1.787    |
| O4–C22      | 1.171             | 1.177    |
| O5–C23      | 1.186             | 1.178    |
| O6–C24      | 1.191             | 1.179    |
| N3–C25      | 1.376             | 1.372    |
| N3–C29      | 1.396             | 1.402    |
| N4–C30      | 1.387             | 1.392    |
| N4–C34      | 1.361             | 1.363    |
| C25–C26     | 1.351             | 1.370    |
| C26–C27     | 1.441             | 1.436    |
| C27–C28     | 1.441             | 1.379    |
| C28–C29     | 1.401             | 1.416    |
| C29–C30     | 1.411             | 1.413    |
| C30–C31     | 1.431             | 1.418    |
| C31–C32     | 1.361             | 1.379    |
| C32–C33     | 1.431             | 1.434    |
| C33–C34     | 1.351             | 1.375    |
| C22–Mn2–C23 | 97.24             | 89.58    |
| C22–Mn2–C24 | 91.34             | 95.43    |
| C23–Mn2–C24 | 88.94             | 91.58    |
| N3–Mn2–N4   | 78.82             | 78.41    |
| N3–Mn2–C22  | 122.93            | 140.59   |
| N3–Mn2–C23  | 122.93            | 123.76   |
| N3–Mn2–C24  | 93.03             | 92.99    |
| N4–Mn2–C22  | 95.83             | 96.93    |
| N4–Mn2–C23  | 94.63             | 94.24    |
| N4–Mn2–C24  | 171.73            | 170.30   |

<sup>a</sup> Experimental structure of [Mn(bpy-*t*Bu)(CO)<sub>3</sub>][K(18-crown-6)(THF)]

**Table S4. Output xyz coordinates from the DFT Geometry Optimization calculation of [Mn(bpy-*t*Bu)(CO)<sub>3</sub>]<sup>−</sup>**

| Atom | X         | Y        | Z         |
|------|-----------|----------|-----------|
| Mn   | 14.890702 | 3.097274 | 0.073220  |
| O    | 13.854762 | 1.245955 | -1.996049 |
| O    | 12.207178 | 4.066724 | 0.897824  |
| O    | 14.747095 | 0.959568 | 2.134851  |
| N    | 16.830903 | 3.428762 | 0.408004  |
| N    | 15.248656 | 4.662889 | -1.140113 |
| C    | 14.275605 | 1.986711 | -1.183700 |
| C    | 13.277467 | 3.689192 | 0.580677  |
| C    | 14.798064 | 1.813013 | 1.323526  |
| C    | 17.664800 | 2.737239 | 1.250279  |
| H    | 17.205782 | 1.907132 | 1.780148  |
| C    | 18.987119 | 3.031370 | 1.454654  |
| H    | 19.547218 | 2.410431 | 2.153909  |
| C    | 19.606558 | 4.135736 | 0.777632  |
| C    | 18.793488 | 4.822239 | -0.099578 |
| H    | 19.182346 | 5.669547 | -0.661128 |
| C    | 17.434742 | 4.477007 | -0.300990 |
| C    | 16.556229 | 5.138690 | -1.187684 |
| C    | 16.922160 | 6.171541 | -2.087587 |
| H    | 17.966519 | 6.475558 | -2.106791 |
| C    | 16.008511 | 6.767407 | -2.931349 |
| C    | 14.661106 | 6.286449 | -2.837356 |
| H    | 13.863907 | 6.704947 | -3.452087 |
| C    | 14.350293 | 5.268887 | -1.966906 |
| H    | 13.334374 | 4.884705 | -1.901505 |
| C    | 21.087373 | 4.459790 | 0.997837  |
| C    | 21.420706 | 4.477549 | 2.506738  |
| H    | 20.846245 | 5.258731 | 3.025648  |
| H    | 22.494628 | 4.675743 | 2.657993  |
| H    | 21.187167 | 3.517122 | 2.985199  |
| C    | 21.949663 | 3.373536 | 0.310135  |
| H    | 21.675305 | 2.370716 | 0.666964  |
| H    | 23.021625 | 3.534496 | 0.514848  |
| H    | 21.794628 | 3.394819 | -0.779086 |
| C    | 21.474908 | 5.830151 | 0.414892  |
| H    | 21.326313 | 5.866684 | -0.672651 |
| H    | 22.538713 | 6.033181 | 0.613036  |
| H    | 20.881583 | 6.636891 | 0.868102  |
| C    | 16.373833 | 7.870425 | -3.929203 |
| C    | 17.878823 | 8.190729 | -3.914449 |
| H    | 18.214779 | 8.514567 | -2.919652 |
| H    | 18.093833 | 9.003469 | -4.625293 |
| H    | 18.475274 | 7.315749 | -4.211652 |
| C    | 15.996635 | 7.428706 | -5.362037 |
| H    | 16.533032 | 6.509435 | -5.635607 |
| H    | 16.259873 | 8.212707 | -6.090831 |
| H    | 14.920837 | 7.228061 | -5.451386 |
| C    | 15.597004 | 9.162081 | -3.581497 |
| H    | 14.511983 | 8.989670 | -3.592782 |
| H    | 15.824444 | 9.960057 | -4.306318 |
| H    | 15.868241 | 9.518040 | -2.577465 |
